# Supplementary material for: Differential regulation by ppGpp versus pppGpp in Escherichia coli
Source: Oxford University Press journal article supplement (doi:10.1093/nar/gkt302), 2013-04-25
Supplement: gkt302_supplementary_data.zip [file gkt302_supplementary_data.zip]

Archive with 2 entries (2 files):
- SupMov1.mov
- nar-00452-m-2013-File010.pdf
